# Supplementary material for: Pyridone fused boron-dipyrromethenes: synthesis and properties
Source: Royal Society of Chemistry journal article supplement (doi:10.1039/c2ob26791h), 2012-11-01

## Supporting Information

### Pyridone Fused Boron-Dipyrromethens: Synthesis and Properties

Chunchang Zhao,\* Jinxing Zhang, Xuzhe Wang, Yanfen Zhang

Key Laboratory for Advanced Materials and Institute of Fine Chemicals, East China

University of Science & Technology, Shanghai 200237, P. R. China

E-mail: zhaocchang@ecust.edu.cn

#### *Table of contents*

|                                                                                 |        |
|---------------------------------------------------------------------------------|--------|
| Figure S1. Mass spectra of reaction products.....                               | S2     |
| Figure S2. Absorption and emission spectra of <b>2</b> in various solvents..... | S3     |
| Figure S3. Absorption and emission spectra of <b>3</b> in various solvents..... | S4     |
| Figure S4. Fluorescence decay profile of <b>2</b> .....                         | S5     |
| Figure S5. Fluorescent decay profile of <b>3</b> .....                          | S6     |
| Structure and identification of nitro substituted BODIPYs.....                  | S7     |
| <sup>1</sup> H NMR, <sup>13</sup> C NMR spectra.....                            | S8-S13 |

### Elemental Composition Report

Page 1

#### Single Mass Analysis

Tolerance = 50.0 mDa / DBE: min = -1.5, max = 100.0

Element prediction: Off

Number of isotope peaks used for i-FIT = 2

Monoisotopic Mass, Even Electron Ions

77 formula(e) evaluated with 1 results within limits (up to 1 closest results for each mass)

Elements Used:

C: 0-28 H: 0-35 N: 0-4 O: 0-2 F: 0-2 11B: 0-1

CC-ZHAO

ECUST institute of Fine Chem

24-Feb-2012

14:25:40

1: TOF MS ES+

2.71e+004

ZCC-ZJX-1 28 (0.937) Cm (25:28)

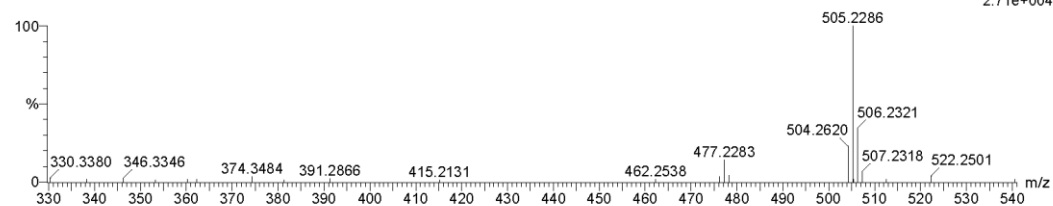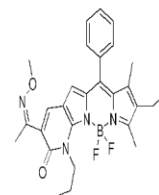

### Elemental Composition Report

Page 1

#### Single Mass Analysis

Tolerance = 50.0 mDa / DBE: min = -1.5, max = 100.0

Element prediction: Off

Number of isotope peaks used for i-FIT = 2

Monoisotopic Mass, Even Electron Ions

131 formula(e) evaluated with 1 results within limits (up to 1 closest results for each mass)

Elements Used:

C: 0-29 H: 0-40 N: 0-5 O: 0-3 10B: 0-1 F: 0-2

CC-ZHAO

ECUST institute of Fine Chem

24-Feb-2012

14:16:06

1: TOF MS ES+

1.46e+004

ZCC-ZJX-2 19 (0.668) Cm (17:19)

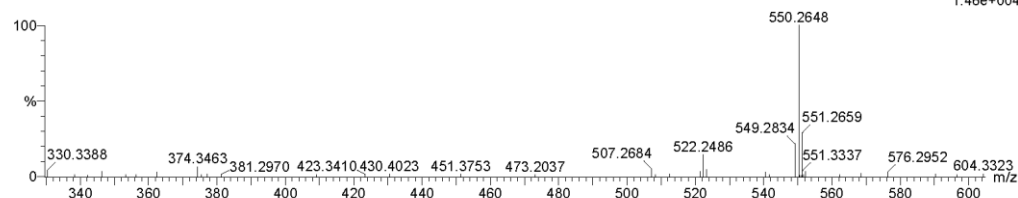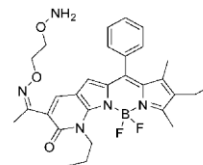

Figure S1. Mass of the reaction products for **1** with methoxyamine and **1** with 1,2-bis(oxyamino)ethane.

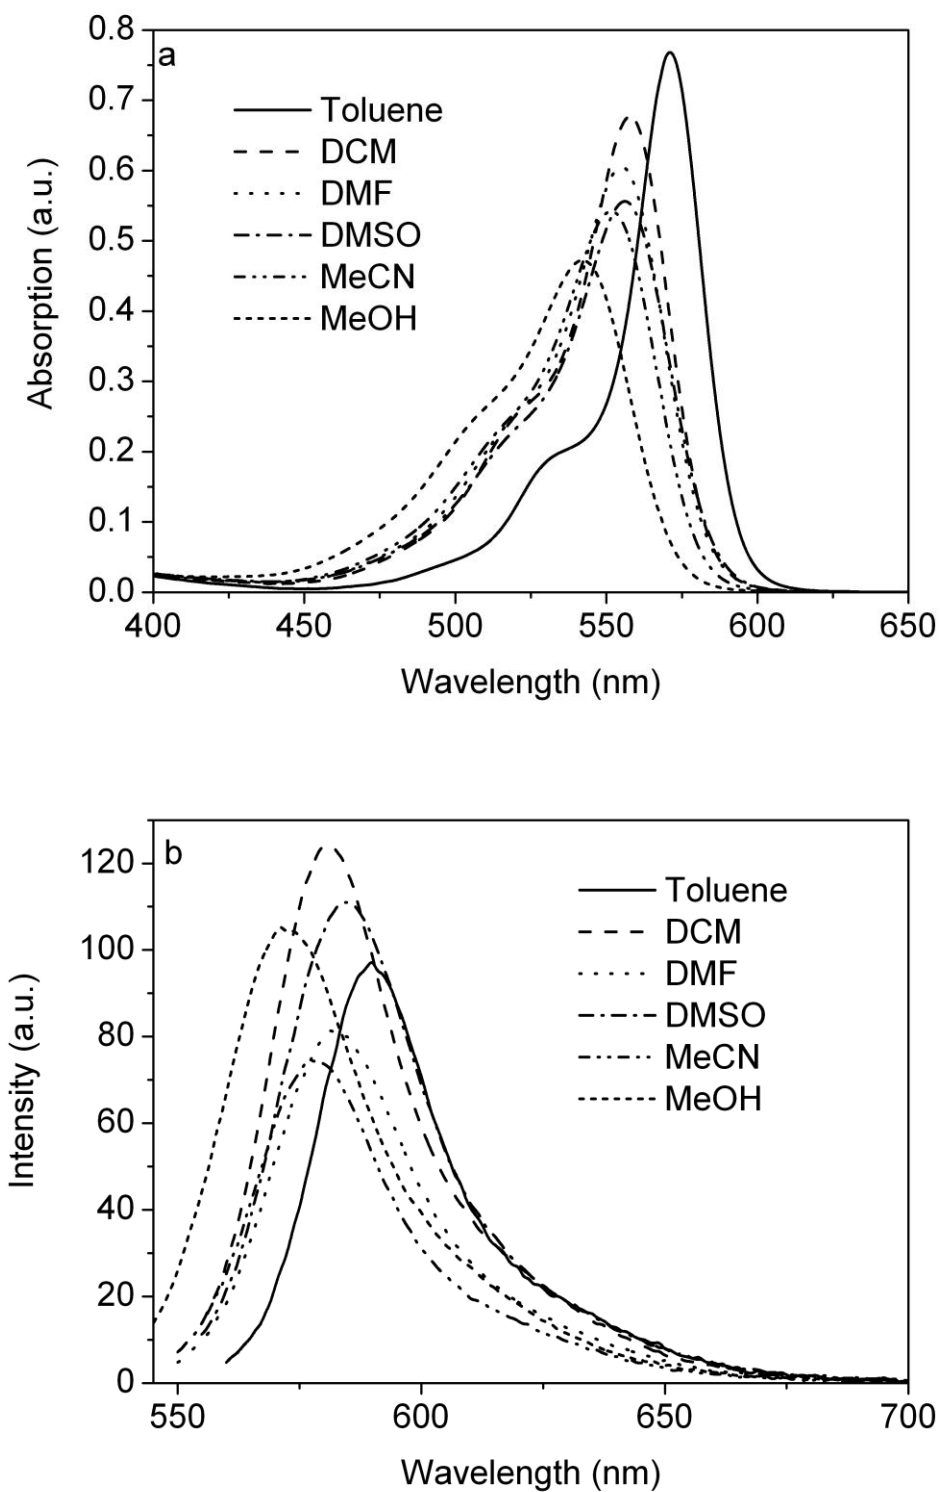

Figure S2. (a) The absorption and (b) emission of **2** in different solvents.

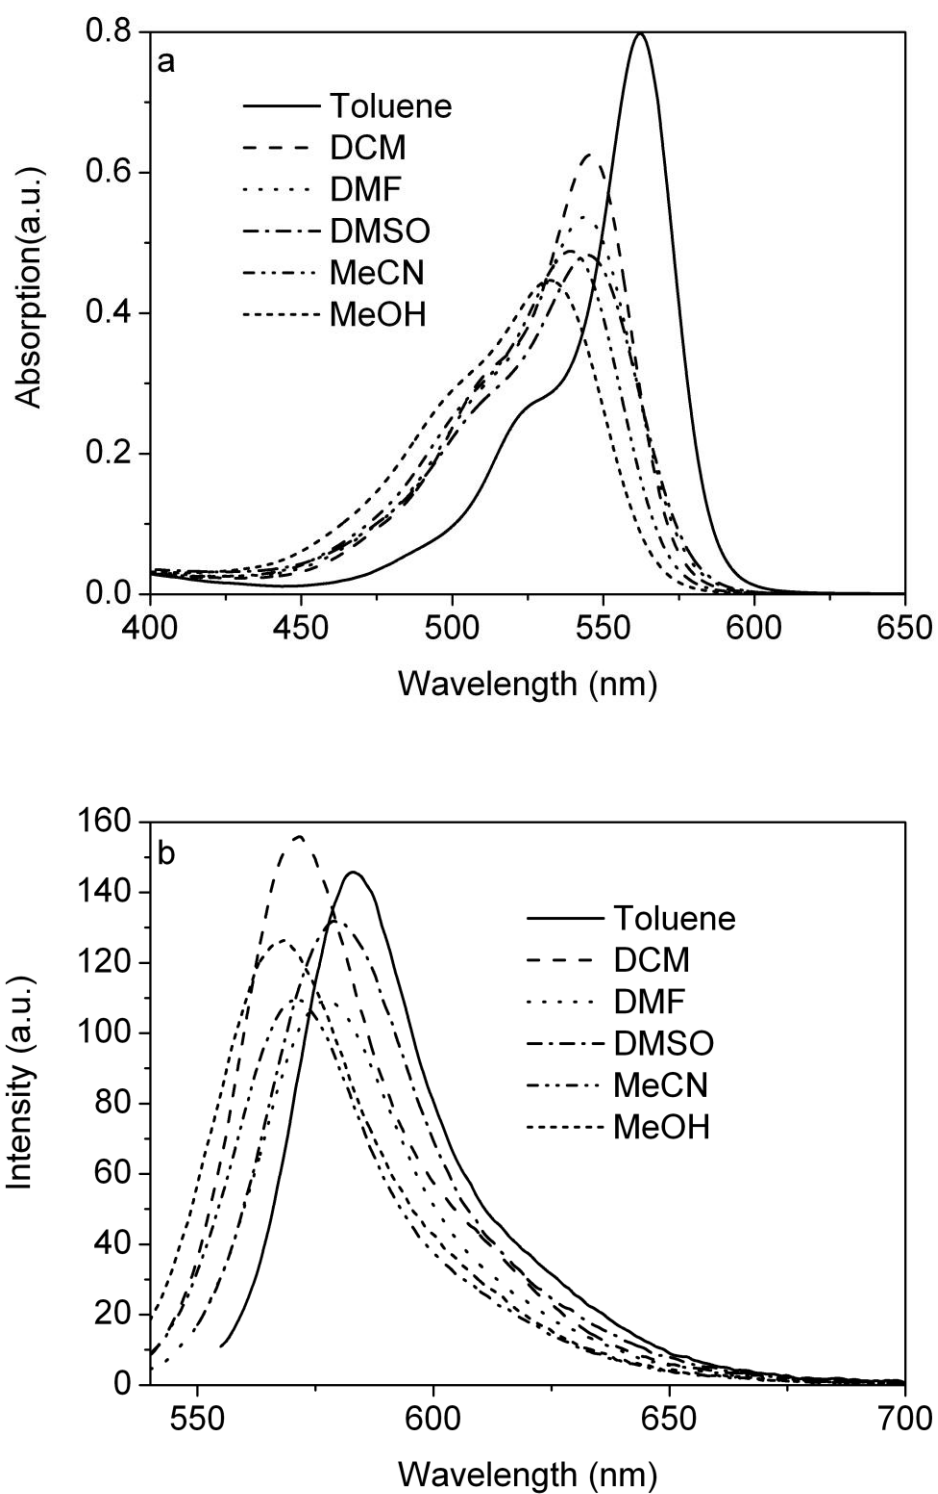

Figure S3. (a) The absorption and (b) emission of **3** in different solvents.

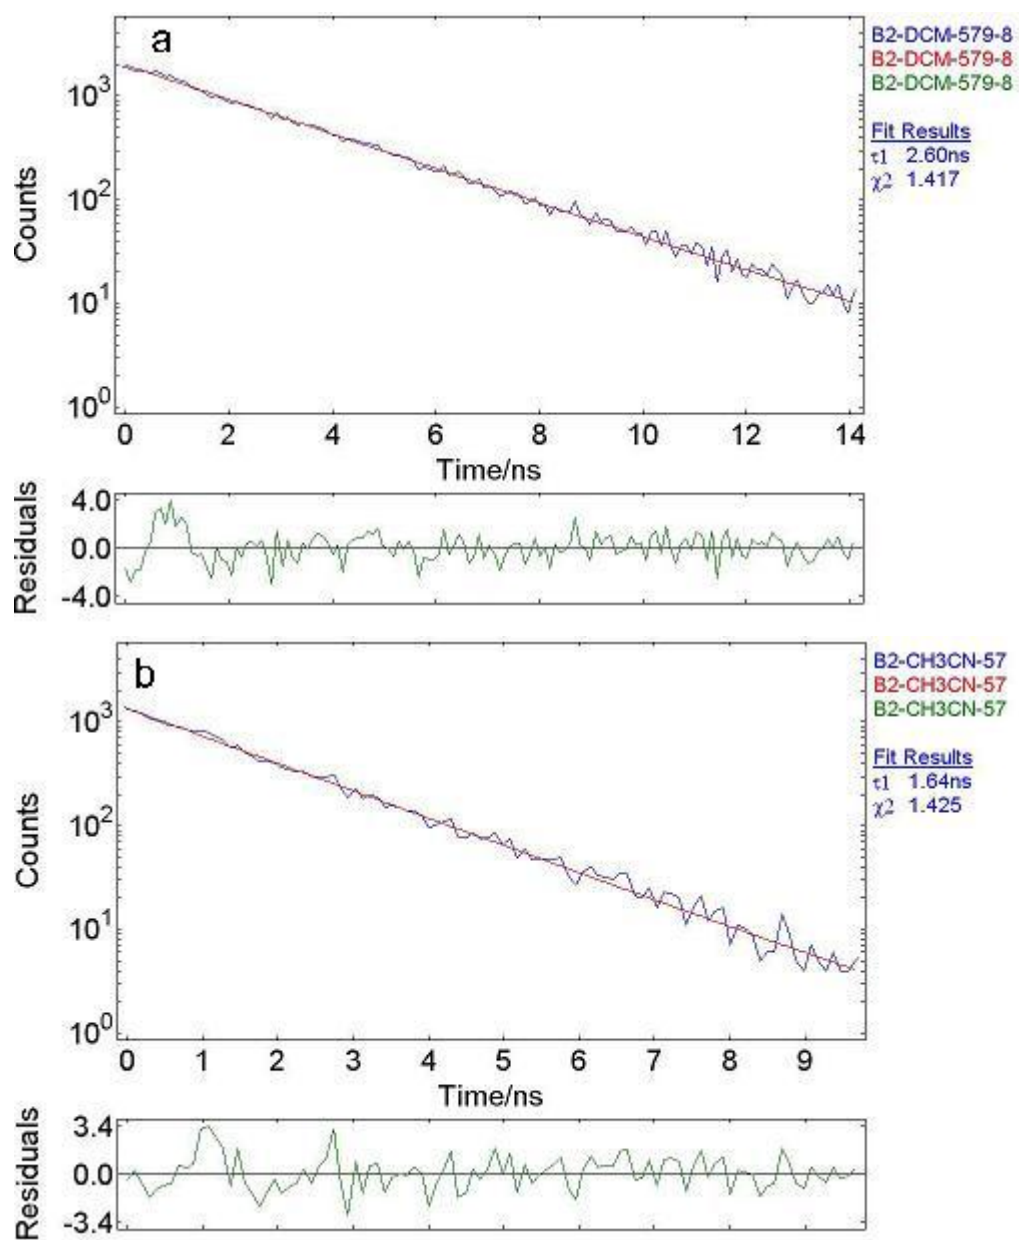

Figure S4. Fluorescent decay profiles of **2** in  $\text{CH}_2\text{Cl}_2$  (a) and  $\text{CH}_3\text{CN}$  (b).

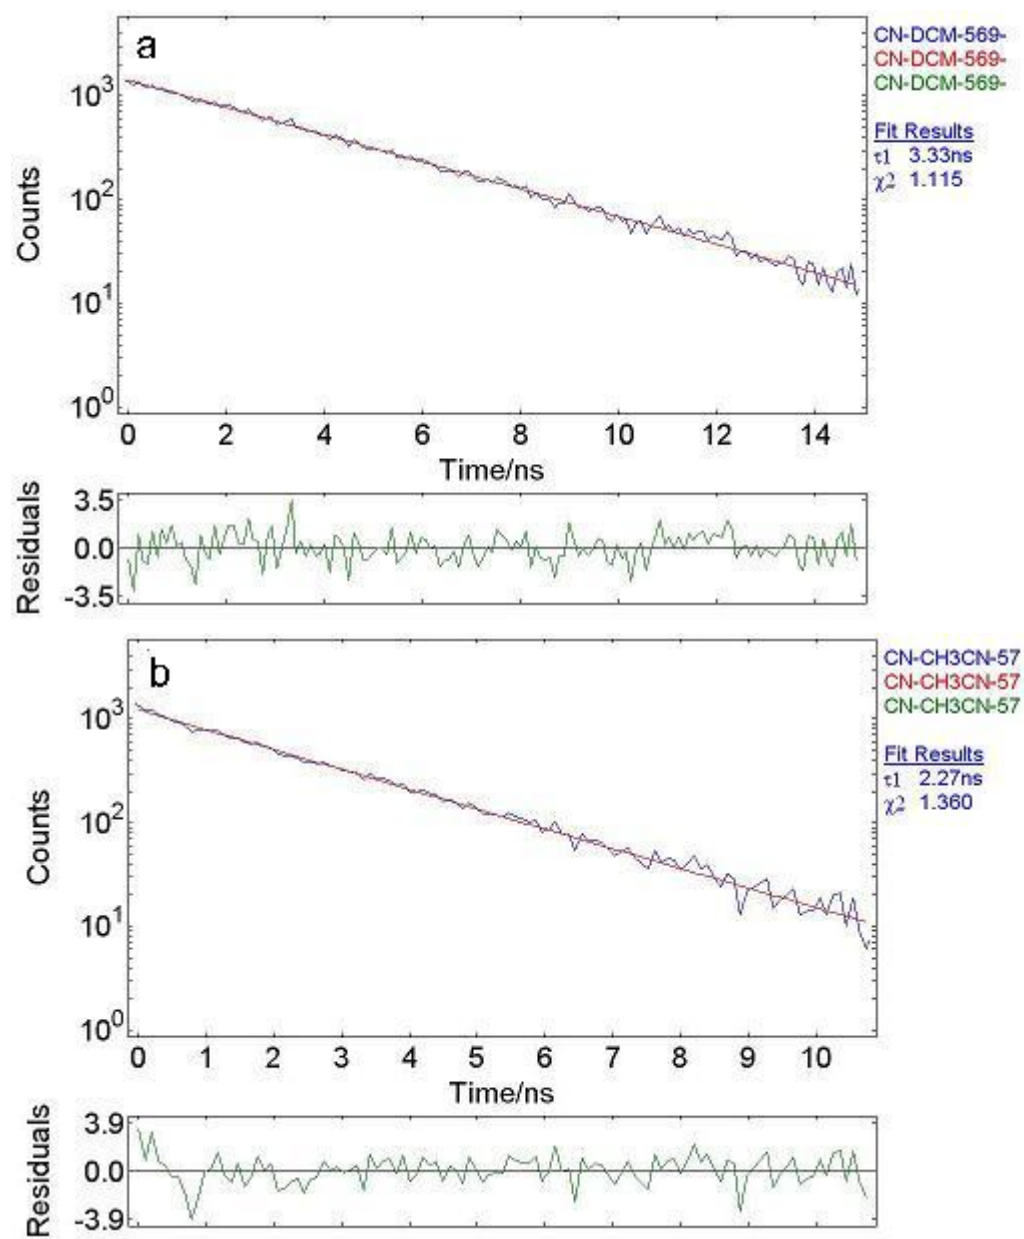

Figure S5. Fluorescent decay profiles of **3** in  $\text{CH}_2\text{Cl}_2$  (a) and  $\text{CH}_3\text{CN}$  (b).

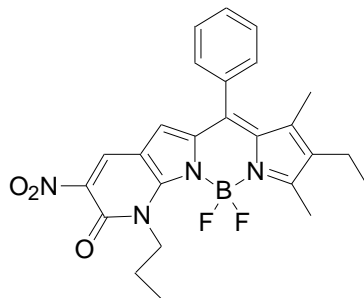

$^1\text{H}$  NMR (400 MHz,  $\text{CDCl}_3$ ):  $\delta$  1.07 (m, 6H), 1.48 (s, 3H), 1.85 (m, 2H), 2.42 (q,  $J$  = 7.6 Hz, 2H), 2.71 (s, 3H), 4.65 (t,  $J$  = 8.0 Hz, 2H), 6.50 (s, 1H), 7.34 (m, 2H), 7.56 (m, 3H), 8.44 (s, 1H);  $^{13}\text{C}$  NMR (100 MHz,  $\text{CDCl}_3$ ):  $\delta$  11.2, 12.3, 13.8, 13.9, 17.3, 21.4, 47.1, 110.9, 122.5, 128.1, 128.7, 129.0, 129.1, 129.9, 132.7, 133.2, 133.7, 136.9, 140.2, 142.5, 149.7, 155.0, 166.7; HRMS (ESI) calcd for  $\text{C}_{25}\text{H}_{25}\text{BN}_4\text{O}_3\text{F}_2$ : 478.1988; found: 478.1991  $[\text{M}]^+$ .

### $^1\text{H}$ NMR and $^{13}\text{C}$ NMR

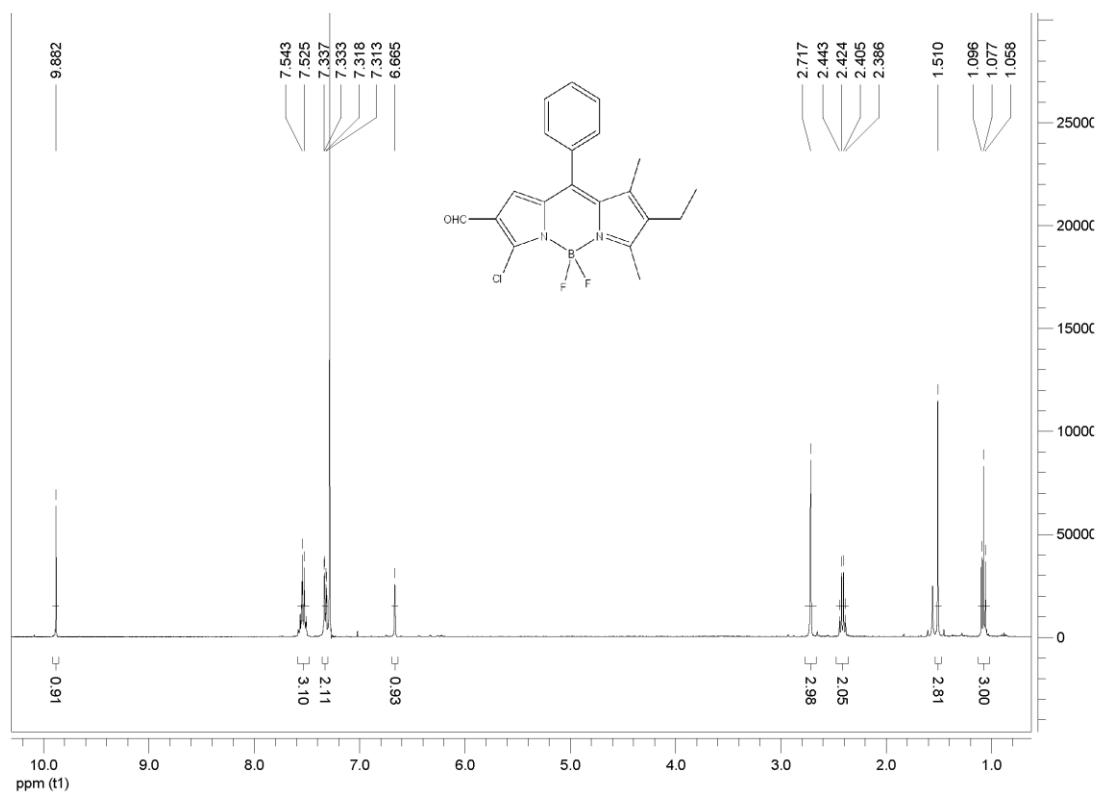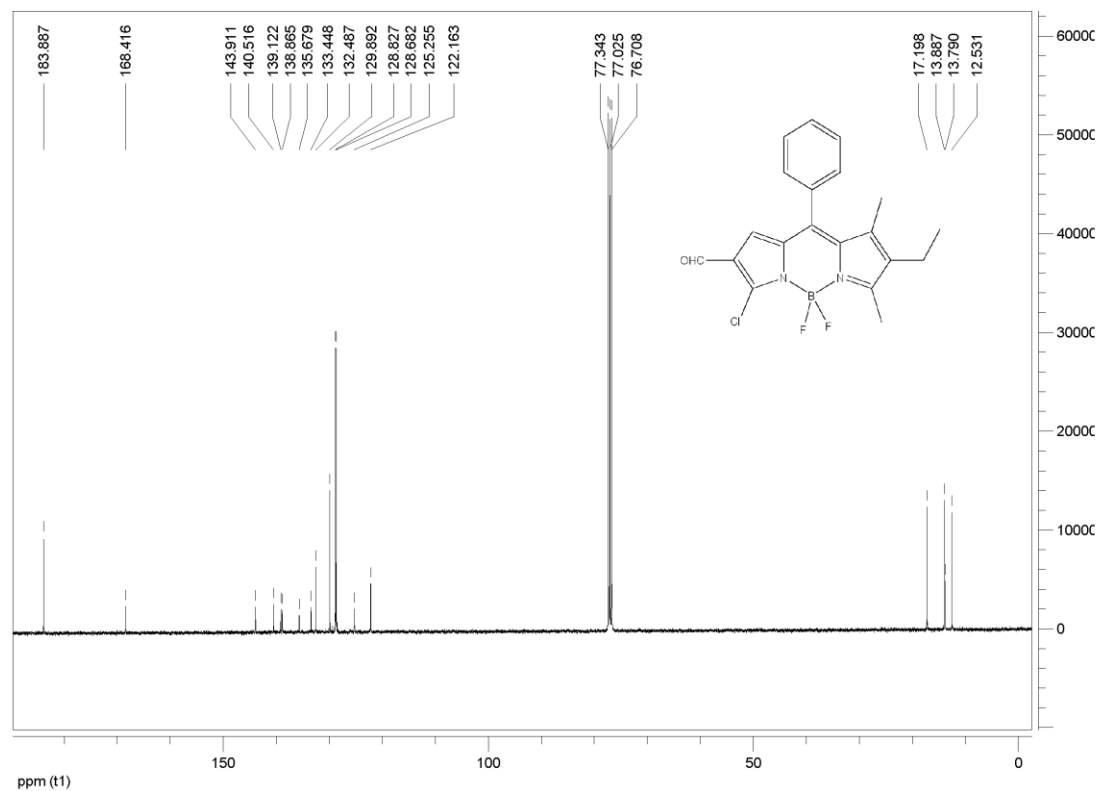



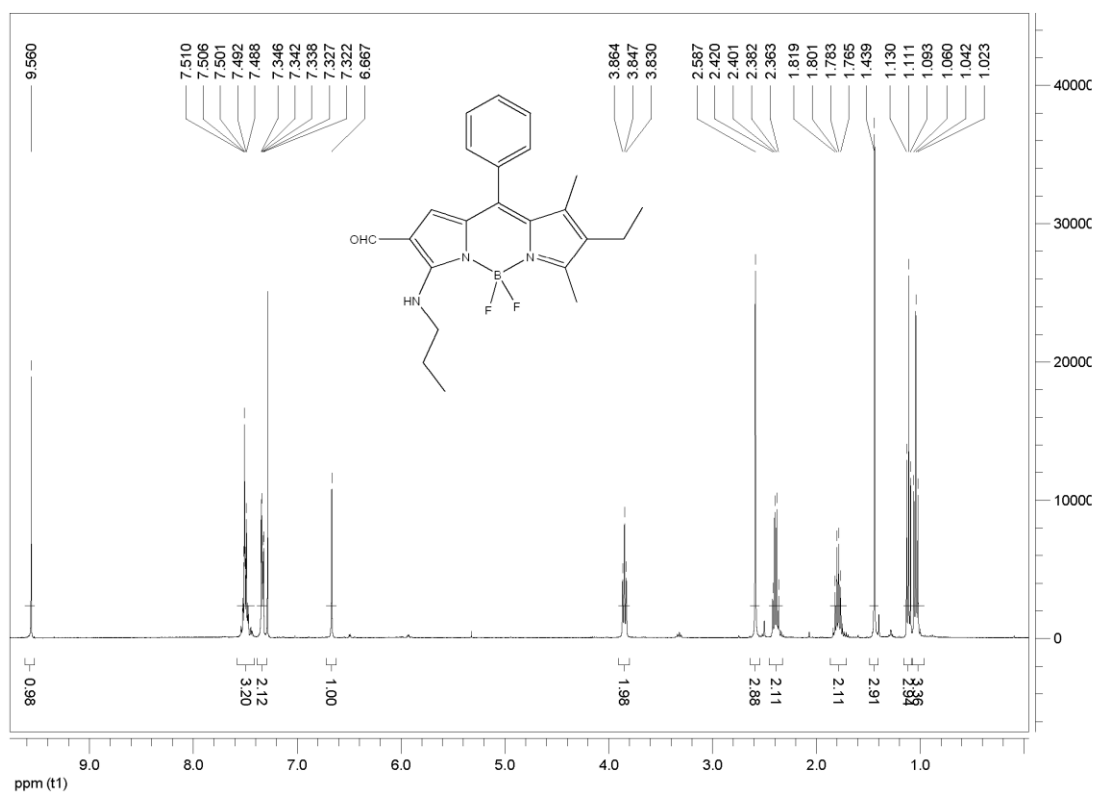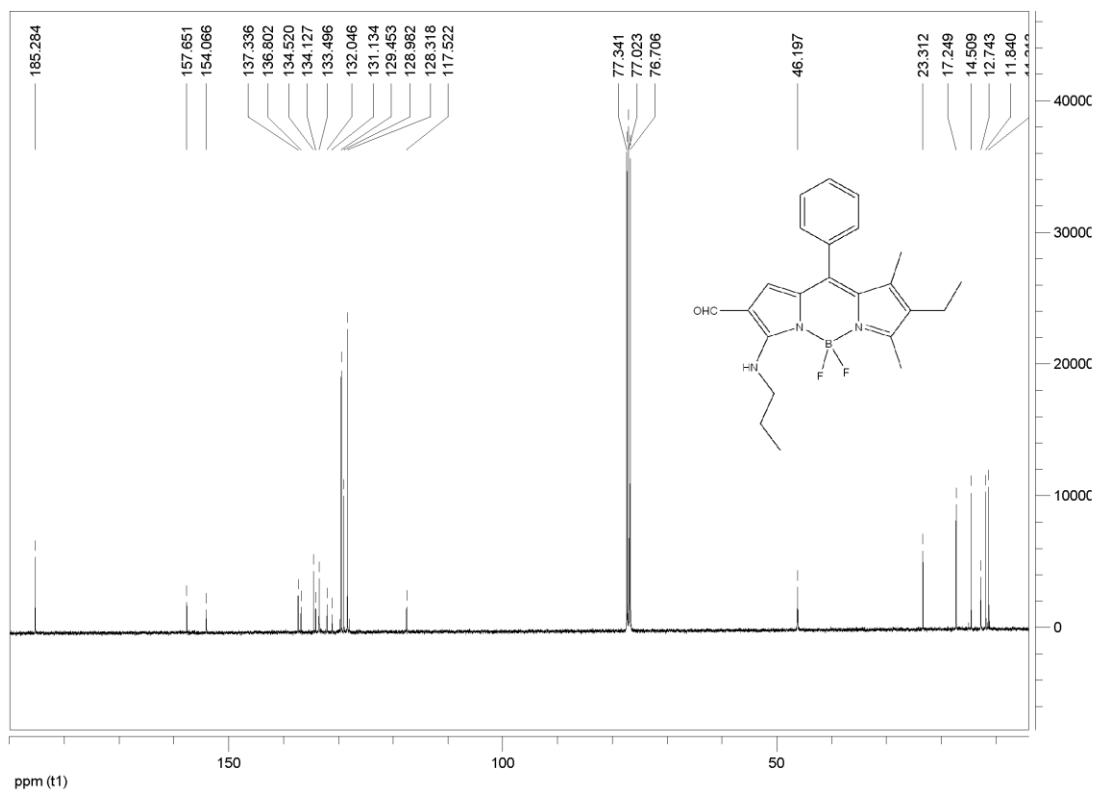

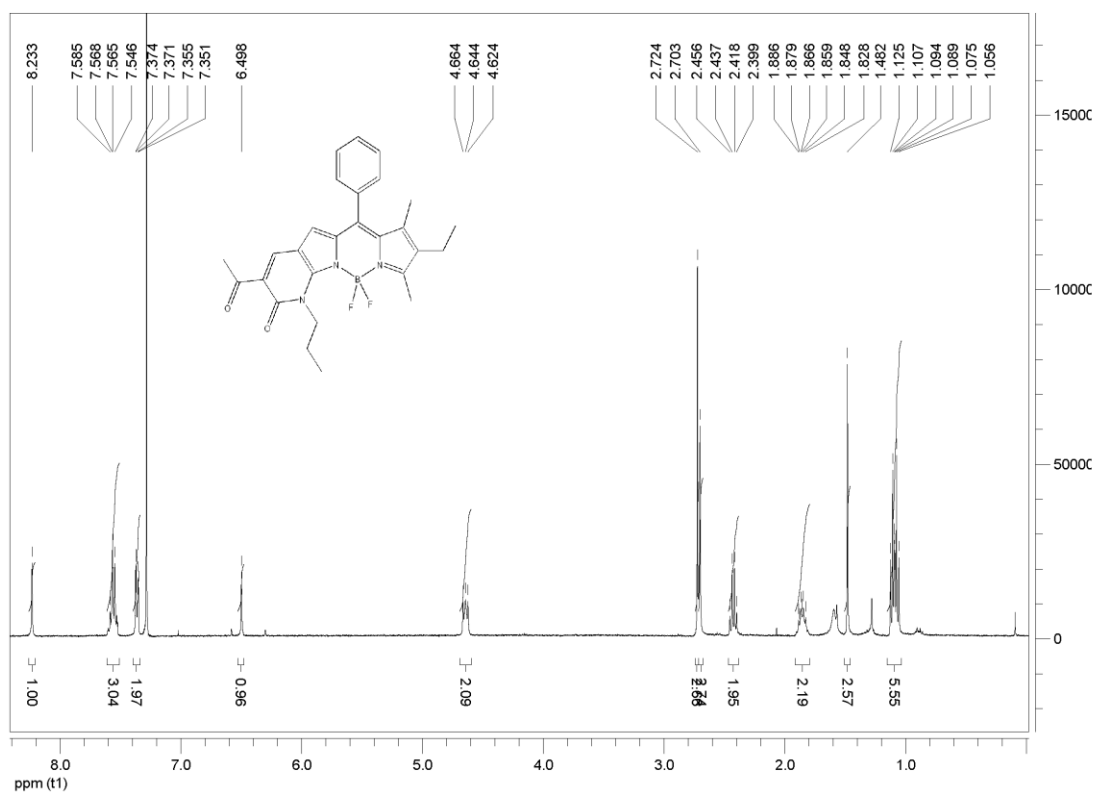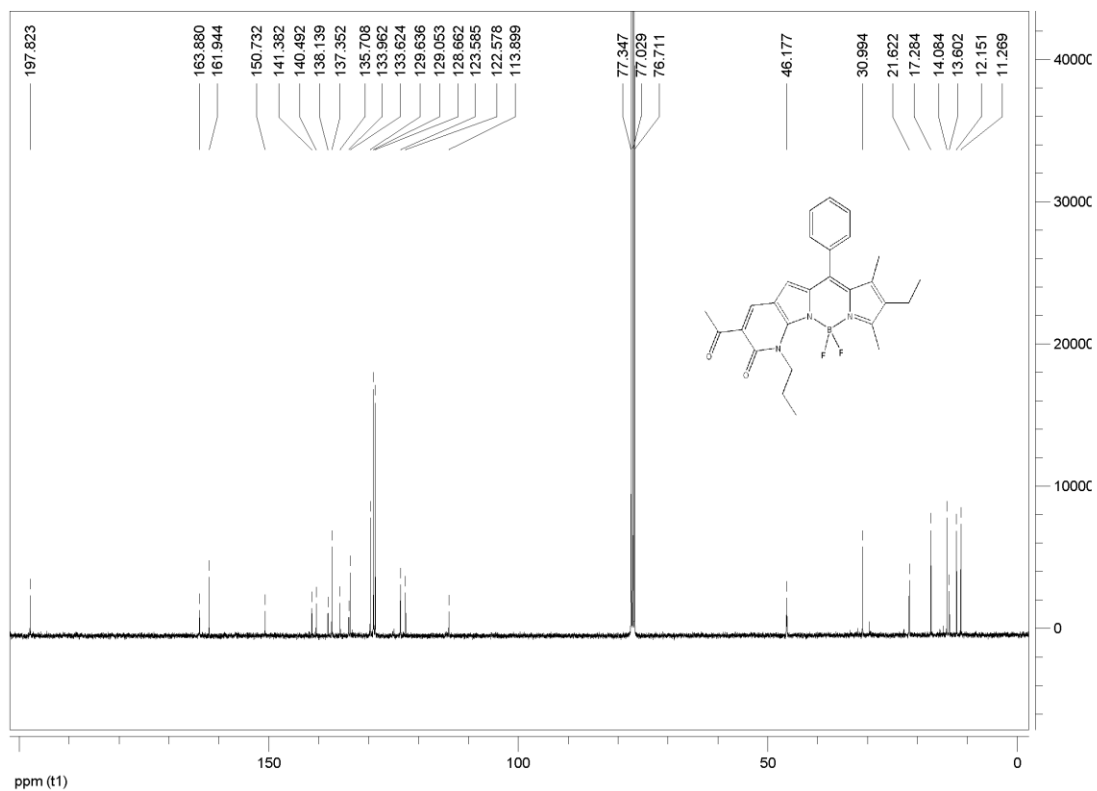

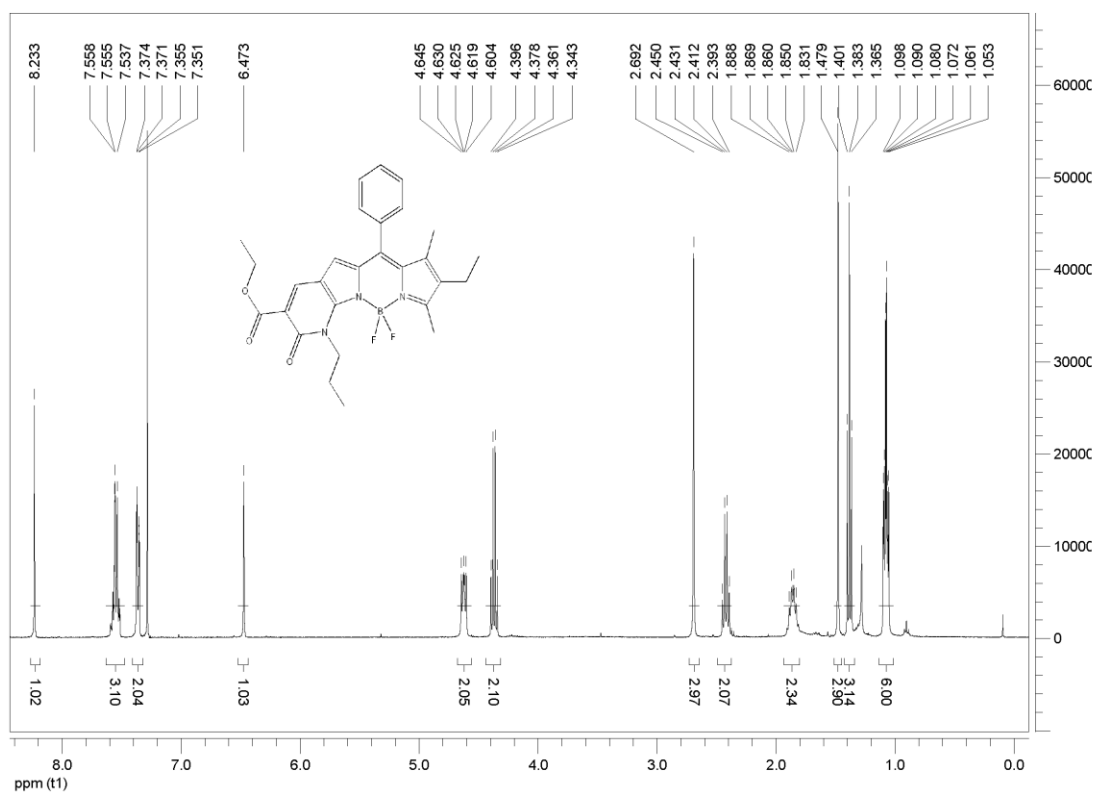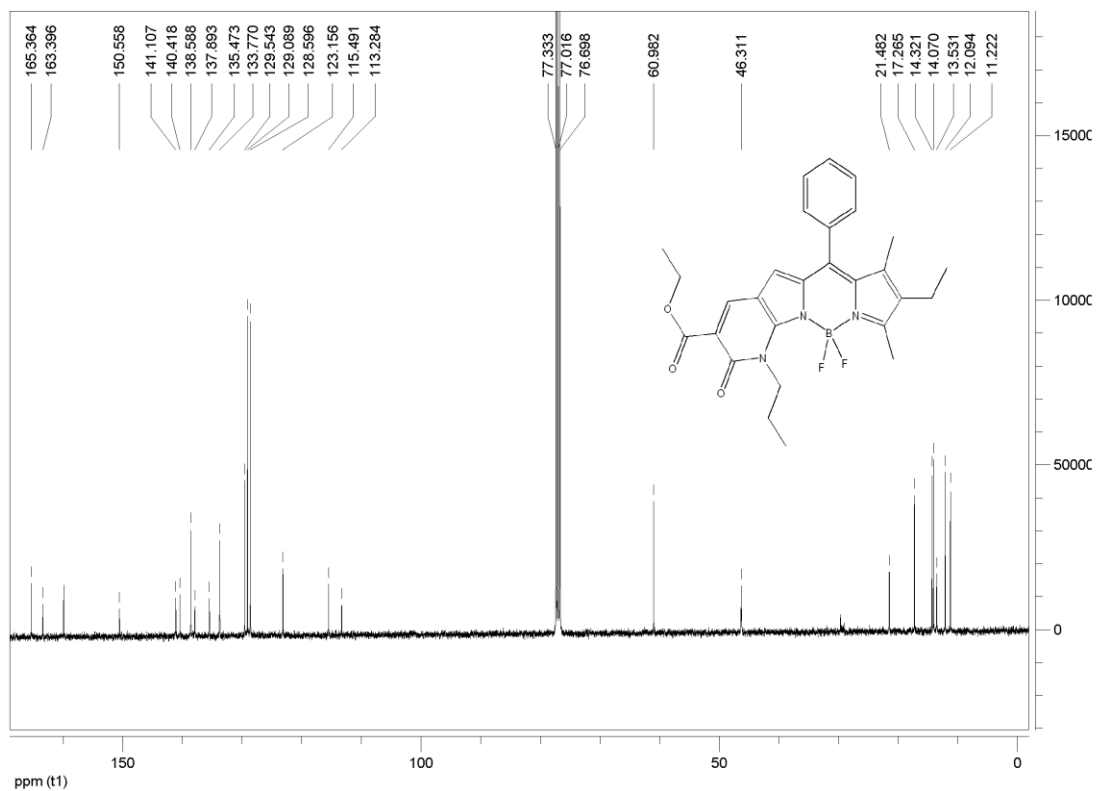

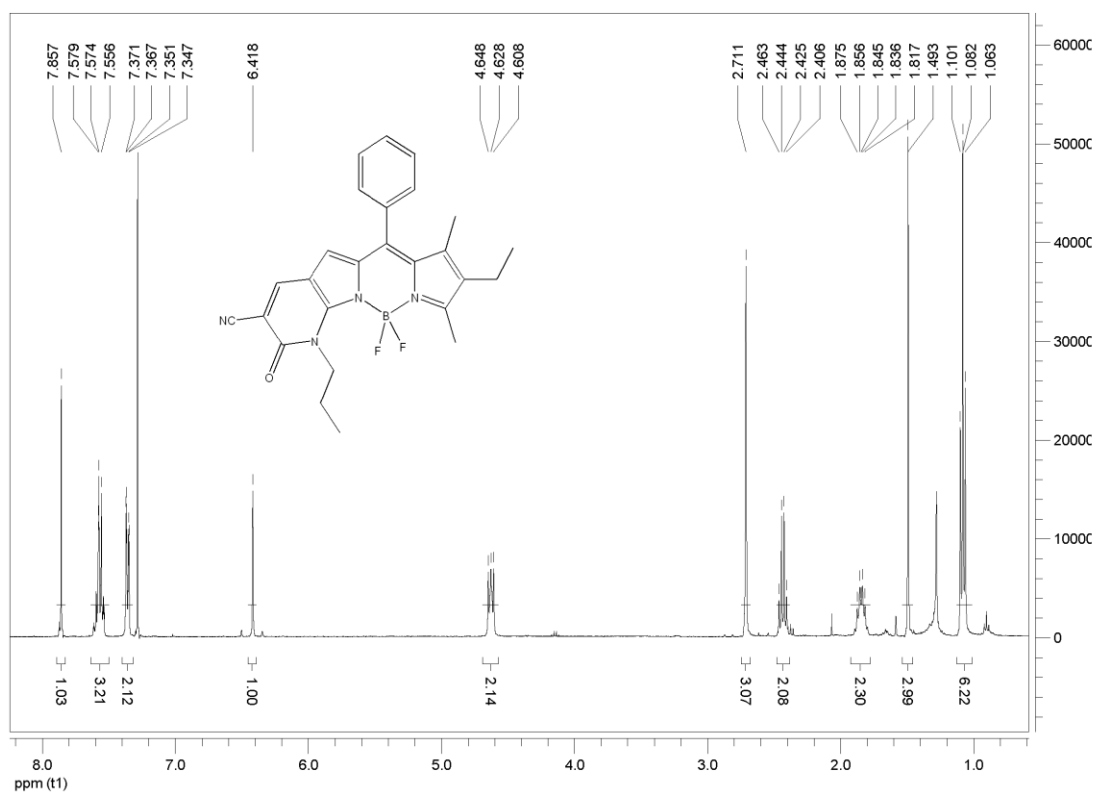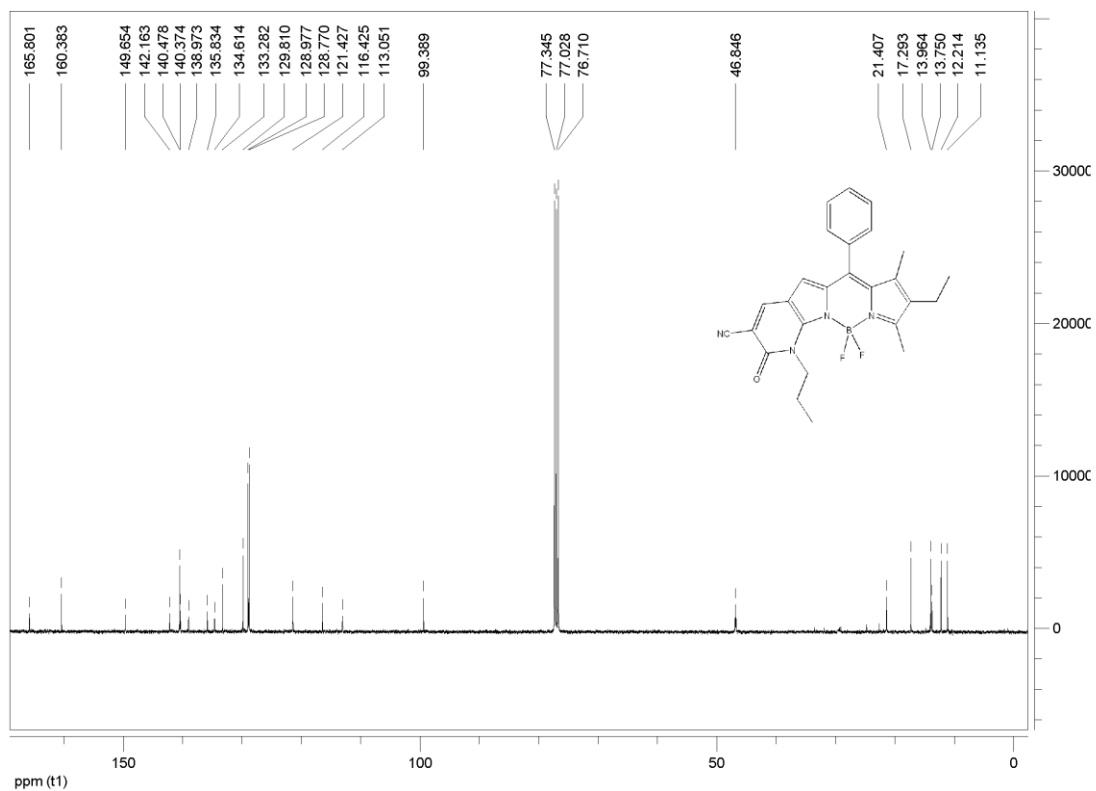

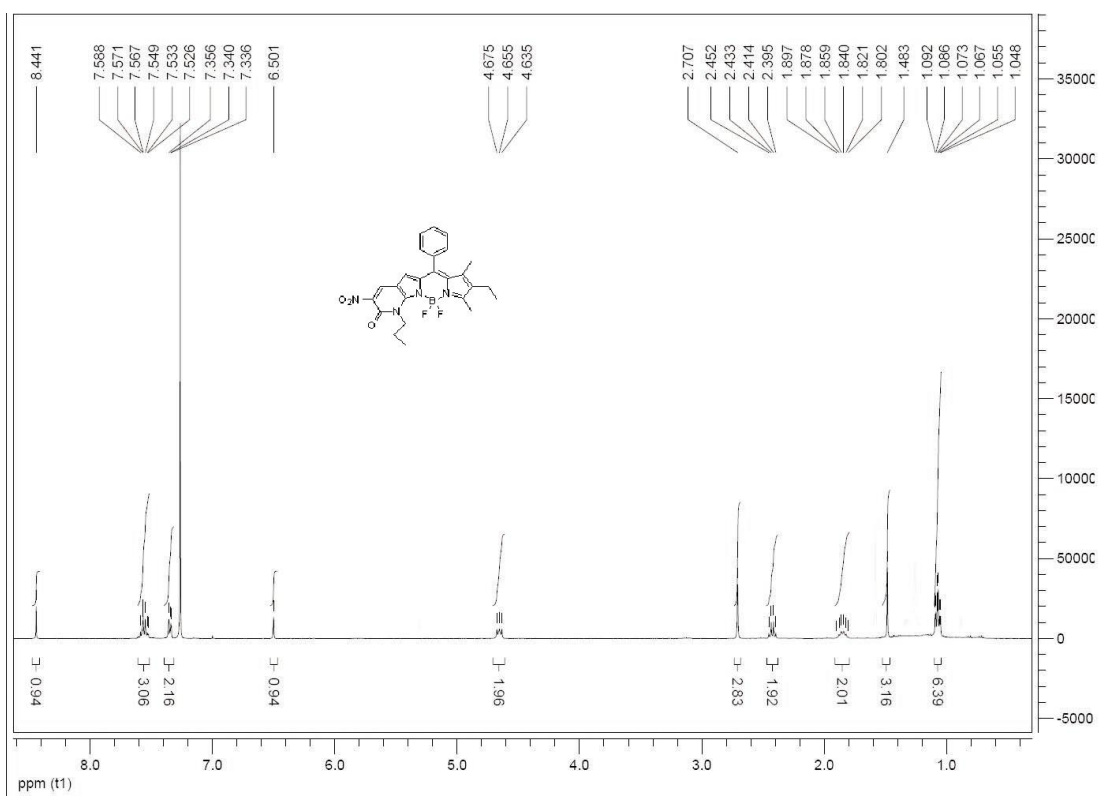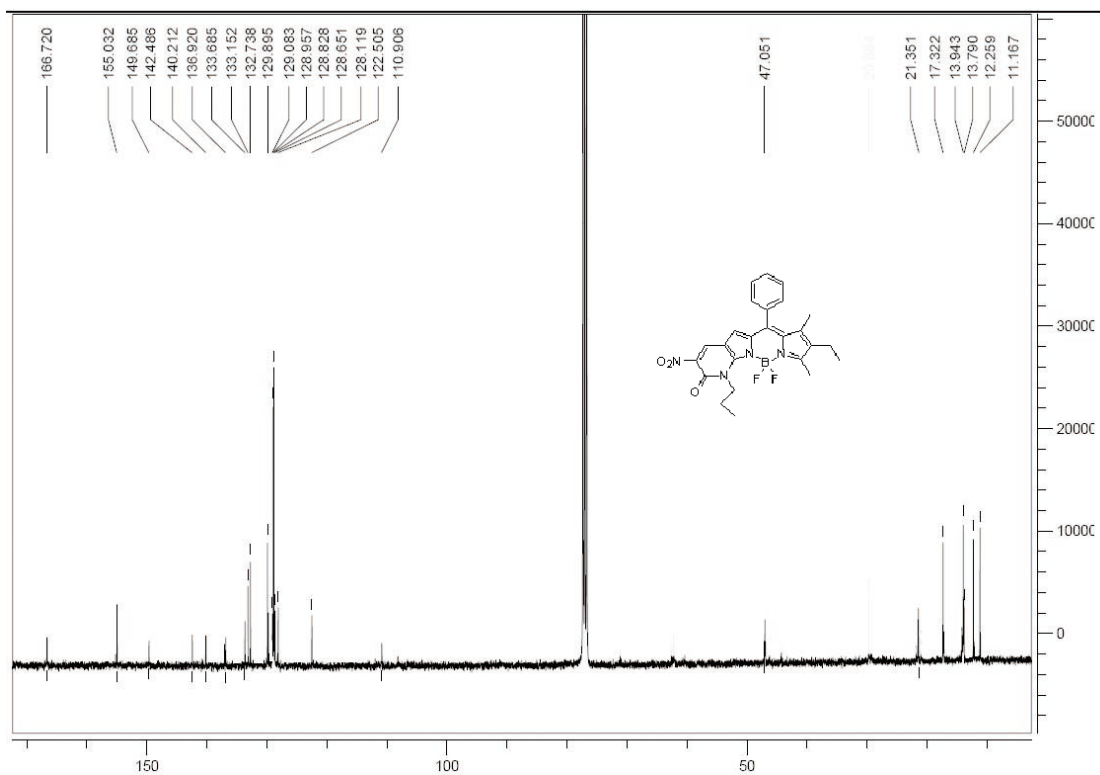

Supplement: c2ob26791h.pdf [file c2ob26791h.pdf]
